# Supplementary material for: Activation of Nrf2 by costunolide provides neuroprotective effect in PC12 cells
Source: Royal Society of Chemistry journal article supplement (doi:10.1039/c8fo02249f), 2019-01-01
Supplement: c8fo02249f1.pdf [file c8fo02249f1.pdf]

## **Activation of Nrf2 by costunolide provides neuroprotective effect in PC12 Cells**

Shoujiao Peng<sup>a,b,c</sup>, Yanan Hou<sup>a</sup>, Juan Yao<sup>a</sup>, and Jianguo Fang<sup>a\*</sup>

<sup>a</sup>State Key Laboratory of Applied Organic Chemistry and College of Chemistry and Chemical Engineering, Lanzhou University, Lanzhou, Gansu 730000, China.

<sup>b</sup>Department of Gastrointestinal Surgery/Hepatobiliary and Enteric Surgery Research Center, Xiangya Hospital, Central South University, 87 Xiangya Road, Changsha, Hunan 410008, China.

<sup>c</sup>Hunan key laboratory of precise diagnosis and treatment of gastrointestinal tumor, 87 Xiangya Road, Changsha, Hunan 410008, China.

\*Corresponding author, E-mail: fangjg@lzu.edu.cn (J. Fang); Fax: +86 931 8915557.

### **Contents**

**Fig. S1:** HPLC chromatogram of COS

**Fig. S2:** Original <sup>1</sup>H NMR spectra of COS

## SAMPLE INFORMATION

|                   |                        |                     |              |
|-------------------|------------------------|---------------------|--------------|
| Sample Name:      | Costunolide PRF9013101 | Acquired By:        | System       |
| Sample Type:      | Unknown                | Sample Set Name:    |              |
| Vial:             | 29                     | Acq. Method Set:    | Costunolide  |
| Injection #:      | 1                      | Processing Method:  | samlpe       |
| Injection Volume: | 10.00 ul               | Channel Name:       | 225.0nm      |
| Run Time:         | 30.0 Minutes           | Proc. Chnl. Descr.: | PDA 225.0 nm |
|                   |                        |                     |              |
| Date Acquired:    | 2018-1-31 14:59:59 CST |                     |              |
| Date Processed:   | 2018-1-31 15:34:15 CST |                     |              |

### Auto-Scaled Chromatogram

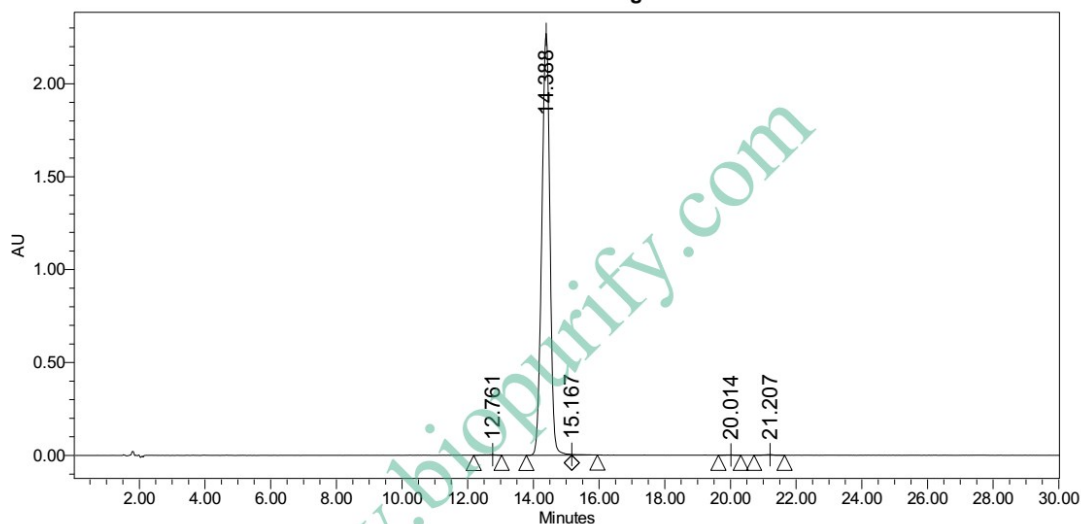

### Peak Results

|   | Name | RT     | Area     | % Area | USP Plate Count | USP Resolution |
|---|------|--------|----------|--------|-----------------|----------------|
| 1 |      | 12.761 | 61828    | 0.16   | 1886.89         |                |
| 2 |      | 14.388 | 38881401 | 99.46  | 16373.43        | 2.44           |
| 3 |      | 15.167 | 76606    | 0.20   |                 | 1.70           |
| 4 |      | 20.014 | 23311    | 0.06   | 6092.58         | 10.47          |
| 5 |      | 21.207 | 49509    | 0.13   | 69966.64        | 2.64           |

**Figure S1.** HPLC chromatogram of COS.

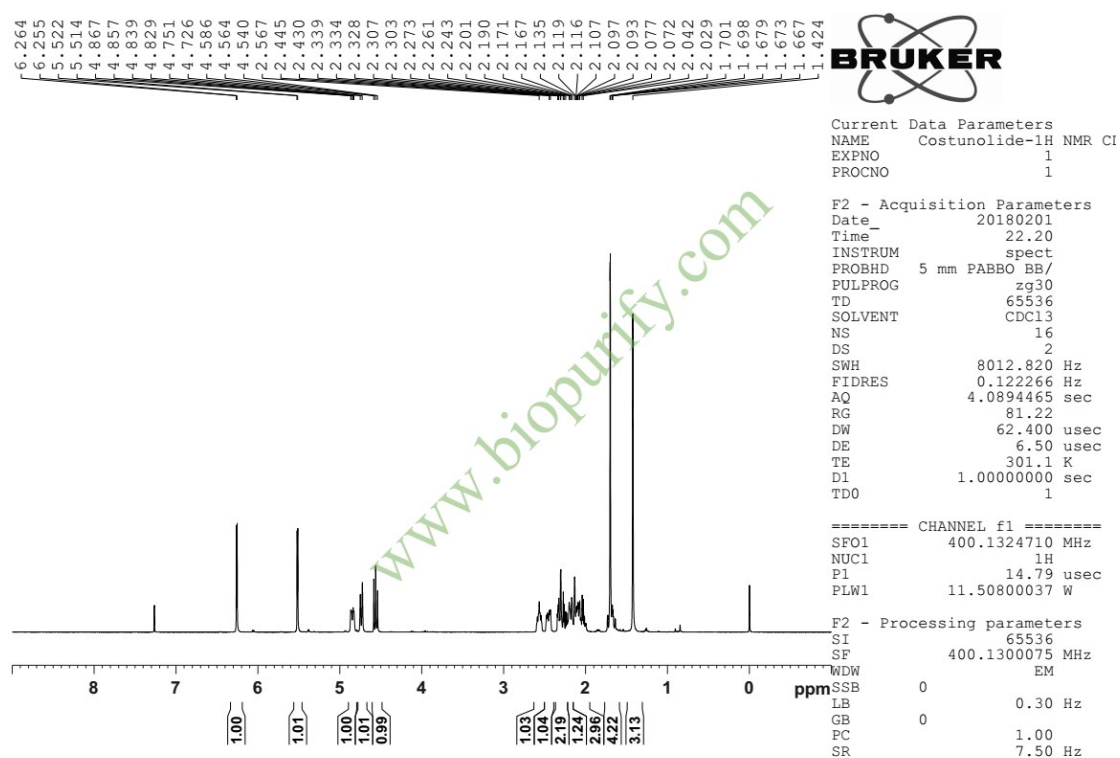

**Figure S2.**  $^1\text{H}$  NMR Spectrum of COS in  $\text{CDCl}_3$  (400 MHz).
